# Supplementary material for: Highly sensitive active pixel image sensor array driven by large-area bilayer MoS2 transistor circuitry
Source: PubMed Central journal article supplement (PMC8196169; doi:10.1038/s41467-021-23711-x), 2021-06-11
Supplement: 41467_2021_23711_MOESM1_ESM.pdf [file 41467_2021_23711_MOESM1_ESM.pdf]

1 **SUPPLEMENTARY INFORMATION for**

2

3 Highly sensitive active pixel image sensor array driven by large-area bilayer MoS<sub>2</sub> transistor  
4 circuitry

5

6 **Authors**

7 *Seongin Hong<sup>†,1</sup>, Nicolò Zagni<sup>†,2</sup>, Sooho Choo<sup>†,1</sup>, Na Liu<sup>†,1</sup>, Seungho Baek<sup>1</sup>, Arindam Bala<sup>1</sup>,*  
8 *Hocheon Yoo<sup>3</sup>, Byung Ha Kang<sup>4</sup>, Hyun Jae Kim<sup>4</sup>, Hyung Joong Yun<sup>5</sup>, Muhammad Ashraf*  
9 *Alam<sup>\*,6</sup> and Sunkook Kim<sup>\*,1</sup>*

10 **Affiliations**

11 <sup>1</sup> School of Advanced Materials Science and Engineering, Sungkyunkwan University, Suwon  
12 440-746, Republic of Korea

13 <sup>2</sup> Department of Engineering “Enzo Ferrari” (DIEF), University of Modena and Reggio  
14 Emilia, Modena 41125, Italy

15 <sup>3</sup> Department of Electronic Engineering, Gachon University, Seongnam 13120, Republic of  
16 Korea

17 <sup>4</sup> School of Electrical and Electronic Engineering, Yonsei University, Seoul 03722, Republic  
18 of Korea

19 <sup>5</sup> Research Center for Materials Analysis, Korea Basic Science Institute (KBSI), Daejeon  
20 34133, Republic of Korea.

21 <sup>6</sup> School of Electrical and Computer Engineering, Purdue University, West Lafayette, Indiana  
22 47907, USA

23

24

25

26

27

28

29

30

31

32

33

34

35

36

37

38

39

40

41

42

43

44

45

46

\*Corresponding author. Email: [alam@purdue.edu](mailto:alam@purdue.edu), [intel0616@gmail.com](mailto:intel0616@gmail.com)

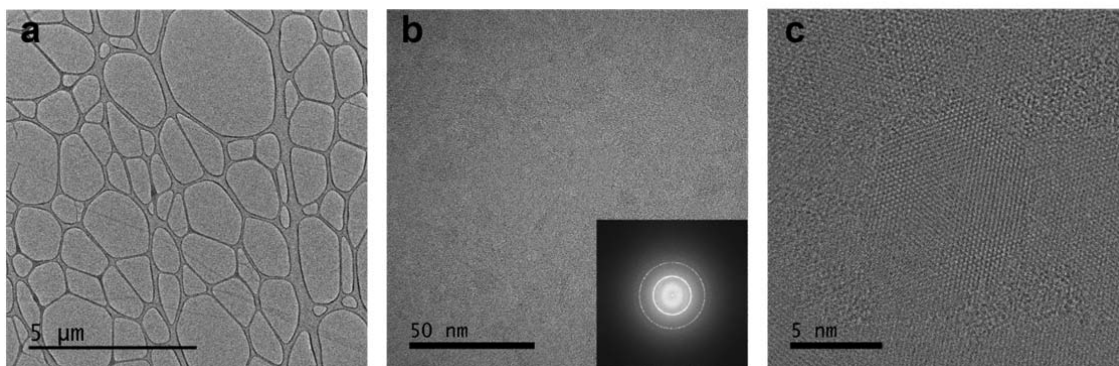

47  
48  
49  
50  
51

**Supplementary Figure 1 | TEM images of bilayer MoS<sub>2</sub> films. a**, Low-magnification and **b and c**, high-magnification TEM images. The inset of **b** is a FFT pattern corresponding to the TEM image.

**a**

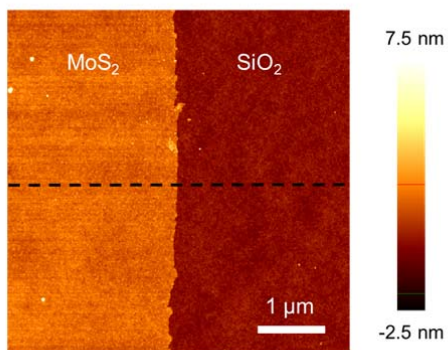

**b**

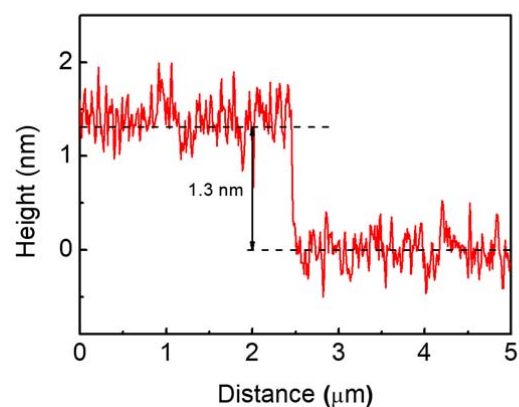

52  
53  
54  
55  
56  
57  
58

**Supplementary Figure 2 | Thickness of a bilayer MoS<sub>2</sub> film directly synthesized on a SiO<sub>2</sub>/Si substrate using the two-step growth method. a, AFM image of the bilayer MoS<sub>2</sub> film. b. Line profile data of dark-dashed line in the AFM image. The thickness of the MoS<sub>2</sub> film was estimated to be approximately 1.3 nm.**

a

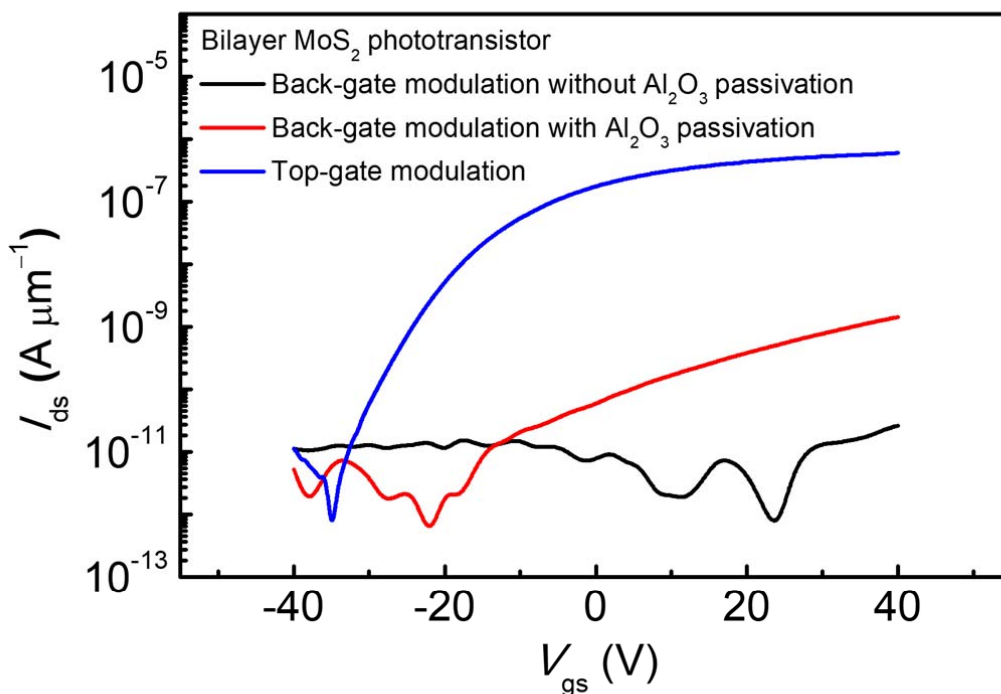

b

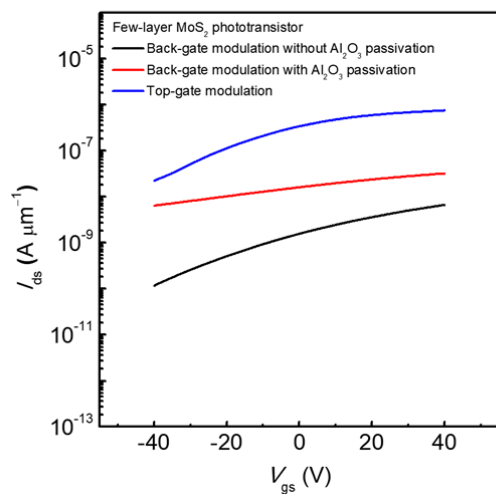

c

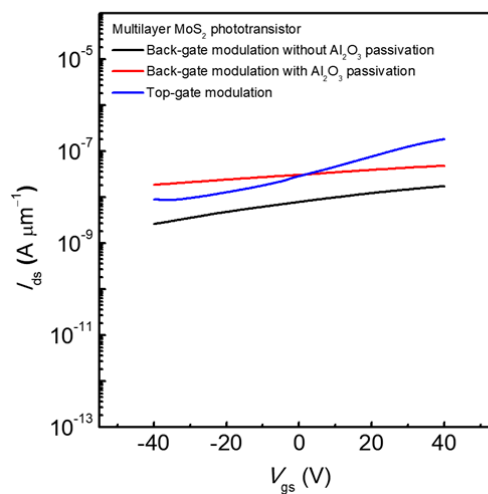

59  
60  
61  
62  
63  
64  
65  
66  
67

**Supplementary Figure 3 | Comparison of the electrical properties of MoS<sub>2</sub> phototransistors.** Transfer curves of **a**, bilayer, **b**, few-layer, and **c**, multilayer MoS<sub>2</sub> phototransistor under back-gate modulation without Al<sub>2</sub>O<sub>3</sub> passivation (black line), back-gate modulation with Al<sub>2</sub>O<sub>3</sub> passivation (red line), and top-gate modulation (blue line).

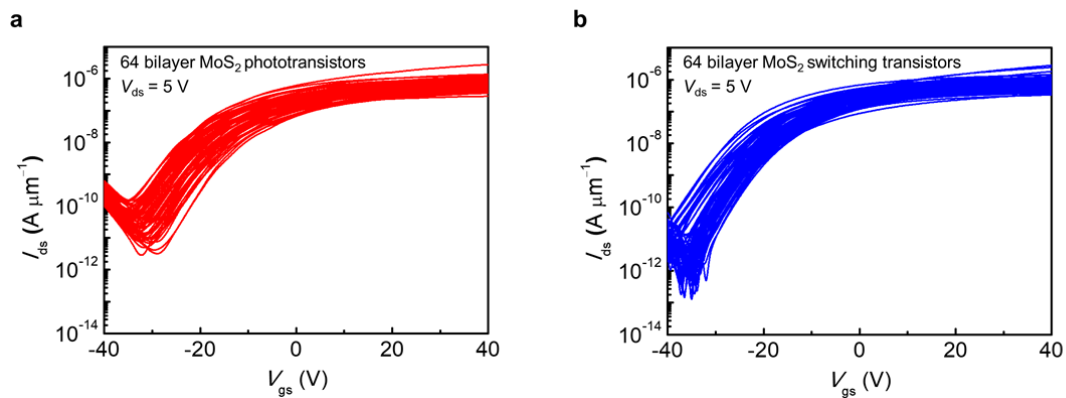

68  
69  
70  
71  
72  
73

**Supplementary Figure 4 | Electrical properties of all the phototransistors and switching transistors in the 8 × 8 active image sensor array with a bilayer MoS<sub>2</sub> film. Transfer characteristics of a, 64 phototransistors and b, 64 switching transistors at V<sub>ds</sub> = 5 V.**

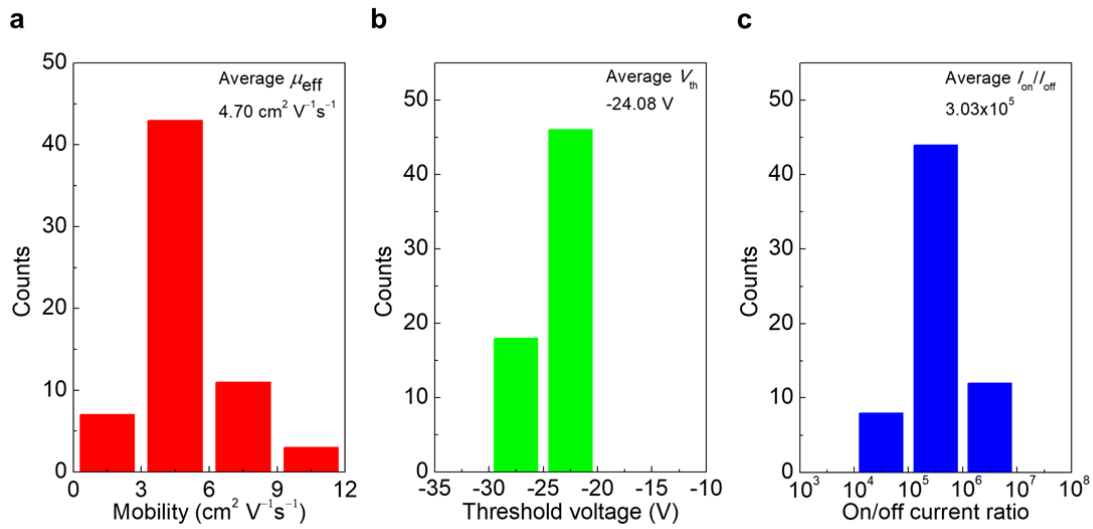

74  
75  
76  
77  
78  
79

**Supplementary Figure 5 | Statistical analysis of switching transistors in the bilayer MoS<sub>2</sub> image sensor array.** Histograms of **a**, field effect mobility (average  $\mu_{\text{eff}} = 4.70 \text{ cm}^2 \text{V}^{-1} \text{s}^{-1}$ ), **b**, threshold voltage (average  $V_{\text{th}} = -24.08 \text{ V}$ ), and **c**, on/off current ratio (average  $I_{\text{on}}/I_{\text{off}} = 3.03 \times 10^5$ ) of the 64 MoS<sub>2</sub> switching transistors.

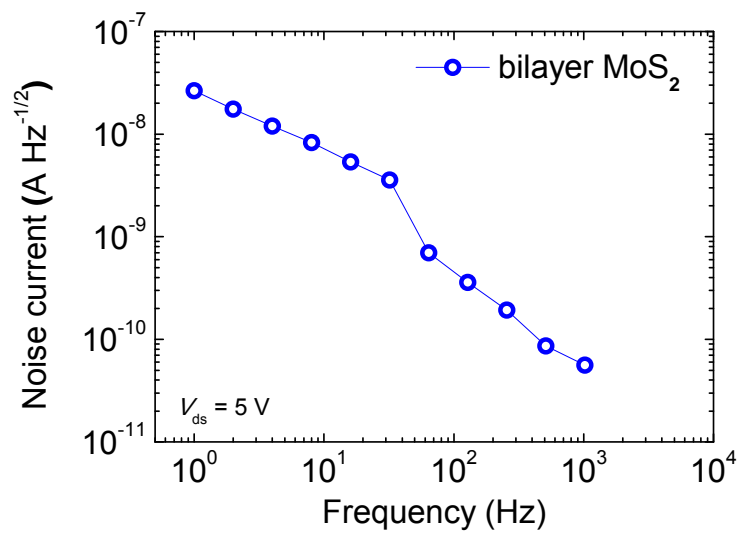

80

81 **Supplementary Figure 6 I** Measured noise current as a function of frequency for the  
82 bilayer MoS<sub>2</sub> phototransistors at V<sub>ds</sub> = 5 V.

83

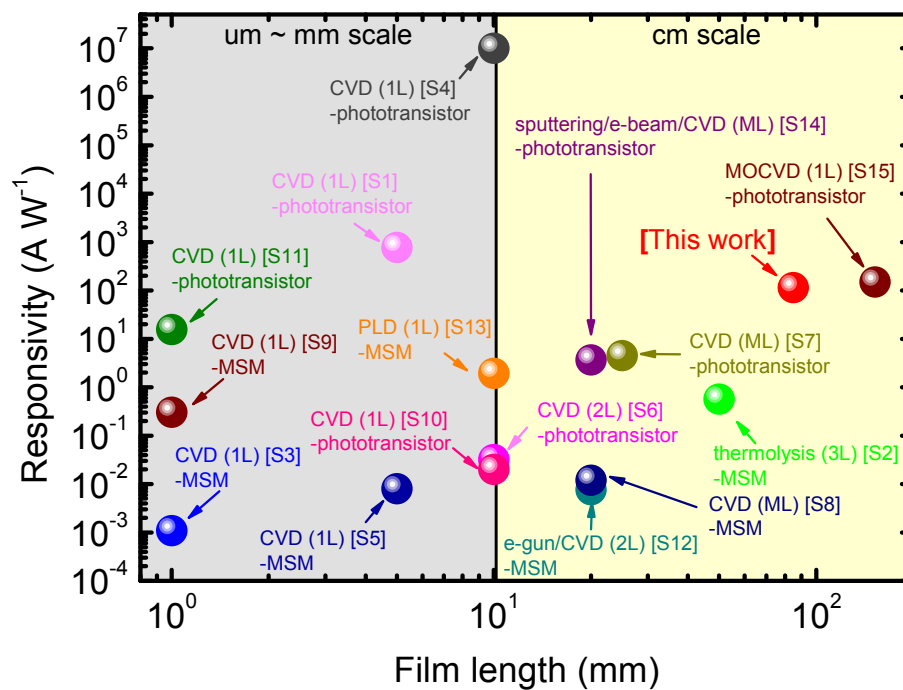

84  
85  
86  
87

**Supplementary Figure 7 I** Comparison of the photoresponsivity of the proposed phototransistor based on the synthesized MoS<sub>2</sub> with those of previous studies.



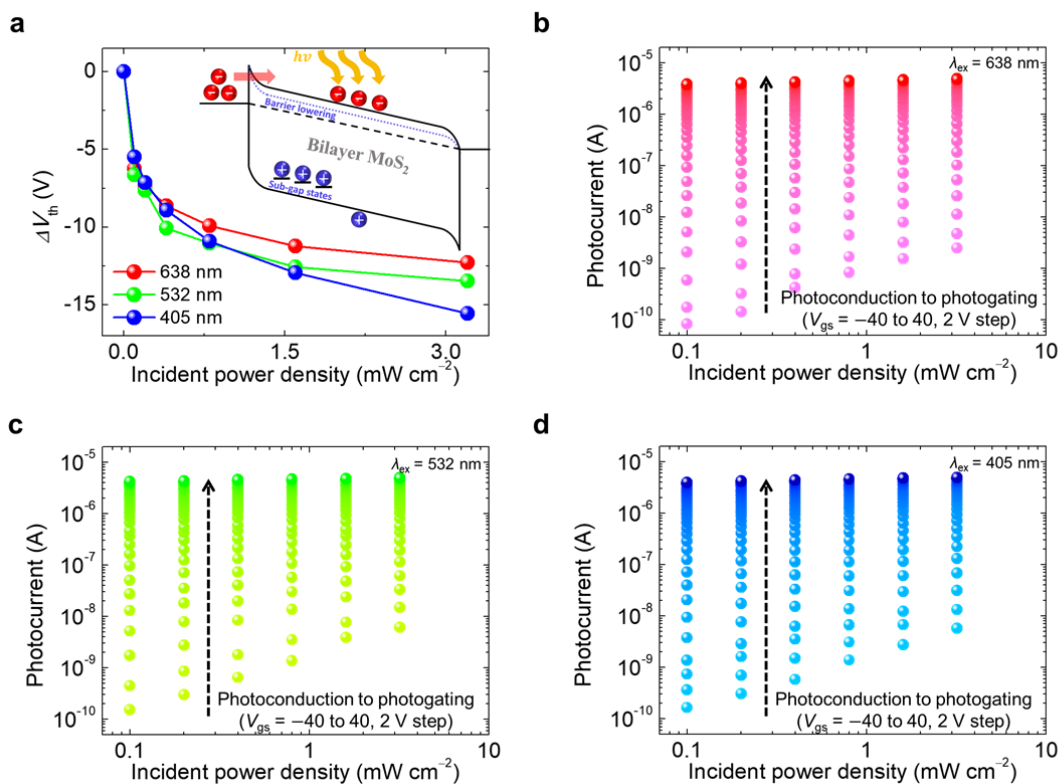

88  
89  
90  
91  
92  
93  
94  
95

**Supplementary Figure 8 | Threshold voltage and photocurrent variation of the bilayer MoS<sub>2</sub> phototransistor as a function of  $P_{inc}$  under RGB light illumination.**  
**a**,  $\Delta V_{th}$ - $P_{inc}$  curves of the MoS<sub>2</sub> phototransistor under RGB light illumination. The inset is the energy band diagram of the MoS<sub>2</sub> phototransistor, indicating the mechanism of the PG effect.  $I_{ph}$ - $P_{inc}$  curves of the MoS<sub>2</sub> phototransistor at various  $V_{gs}$  under **b**, red **c**, green and **d**, blue light illumination.

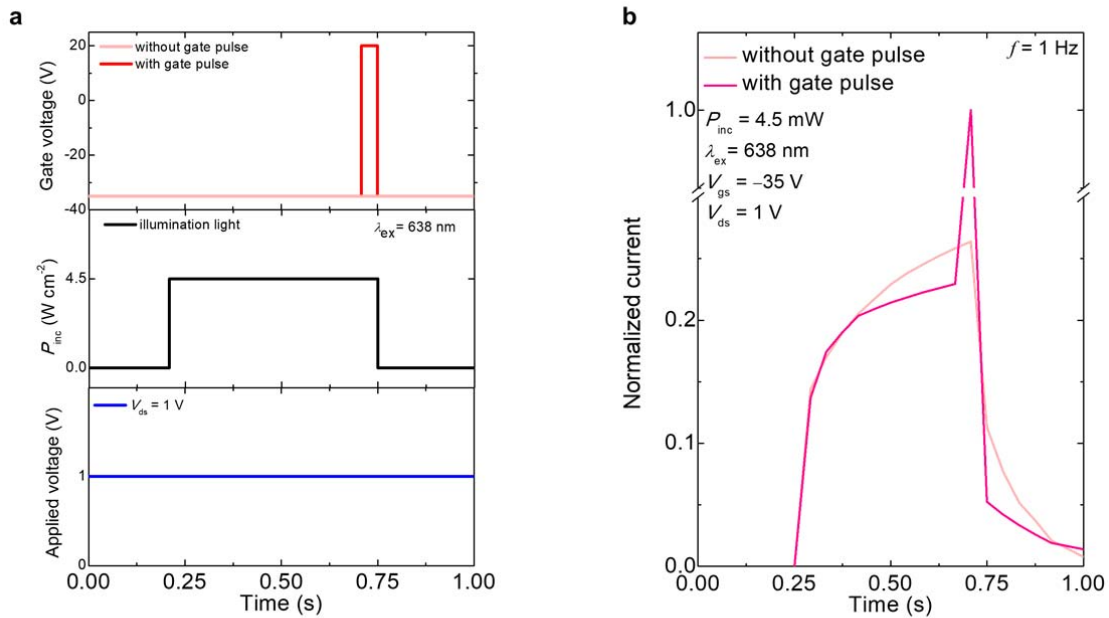

96

97 **Supplementary Figure 9 | Photoswitching characteristics with gate pulse of a**  
 98 **bilayer MoS<sub>2</sub> phototransistor in the image sensor array.** **a**, Measurement  
 99 conditions for photoswitching properties with gate pulse. Switching curves were  
 100 measured at  $V_{\text{ds}} = 1 \text{ V}$ ,  $V_{\text{gs}} = -35 \text{ V}$  and  $P_{\text{inc}} = 4.5 \text{ mW cm}^{-2}$  with illumination  
 101 frequency of 1 Hz. The applied gate pulse is 20 V with a width of 40 ms. **b**, Time  
 102 resolved photoresponsive characteristics of the bilayer MoS<sub>2</sub> phototransistor under  
 103 temporal light illumination with  $\lambda_{\text{ex}} = 638 \text{ nm}$  without and with gate voltage pulse. The  
 104 fall time is improved from 104.80 ms to 23.99 ms.

105

106

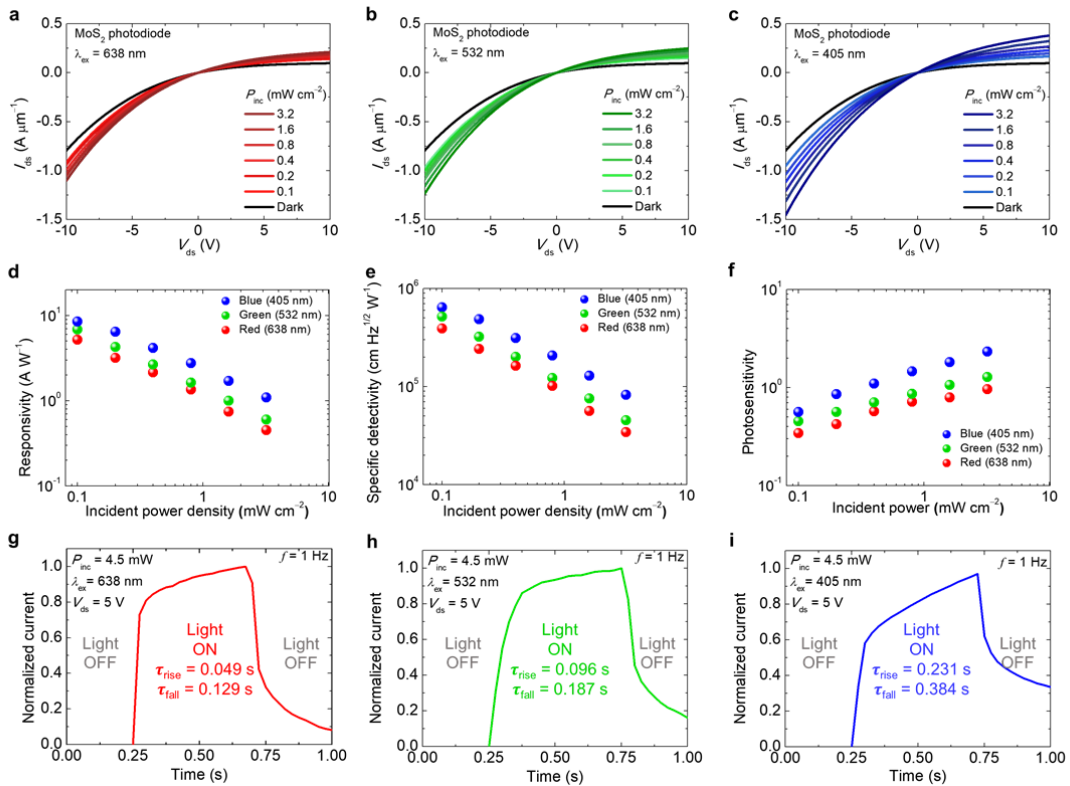

107  
 108  
 109  
 110  
 111  
 112  
 113  
 114  
 115  
 116  
 117  
 118  
 119  
 120  
 121

**Supplementary Figure 10 | Photoresponsive characteristics of a bilayer MoS<sub>2</sub> photodetector without a top-gate electrode in the image sensor array.** *I*–*V* curves of a photodetector without a top-gate electrode based on a bilayer MoS<sub>2</sub> channel under **a**, red **b**, green and **c**, blue light illumination with various incident power densities ( $\lambda_{\text{ex}} = 638$  nm (R), 532 nm (G), 405 nm (B), and  $P_{\text{inc}} = 0.1, 0.2, 0.4, 0.8, 1.6, 3.2$  mW cm<sup>-2</sup>). **d**, Photoresponsivity, **e**, specific detectivity, and **f**, photosensitivity of the MoS<sub>2</sub> photodetector without a top-gate electrode calculated from Supplementary Fig. 10a–c. **g–i**, Photoswitching characteristics of the MoS<sub>2</sub> phototransistor under temporal light illumination with  $\lambda_{\text{ex}} = 638, 532,$  and 405 nm, respectively. All the switching curves were measured at  $V_{\text{ds}} = 5$  V and  $P_{\text{inc}} = 4.5$  mW cm<sup>-2</sup> with the illumination frequency of 1 Hz. The rise and fall times were calculated as the times taken for the current to change from 20–80% and 80–20% of the maximum current, respectively.

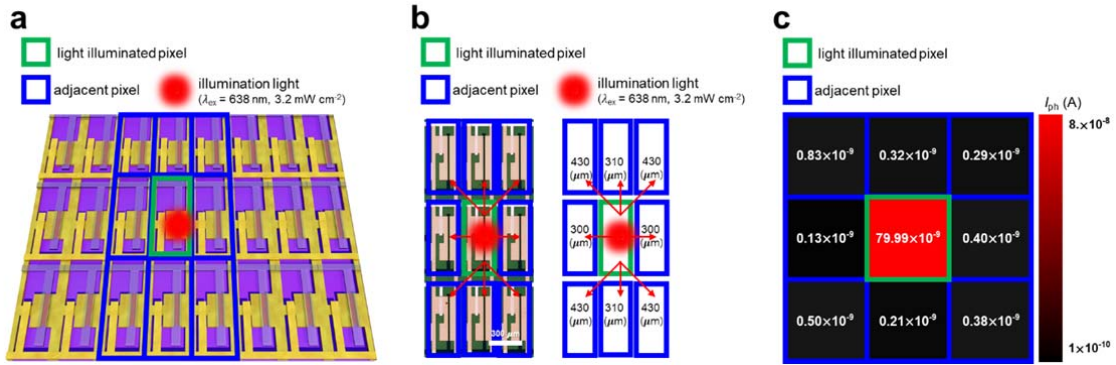

122

123 **Supplementary Figure 11 I Cross-talk characterization of a light-illuminated**  
 124 **pixel and its adjacent pixels. a**, Schematic of the light-illuminated pixel and  
 125 adjacent pixels. **b**, Optical microscopy image of the light-illuminated pixel and  
 126 adjacent pixels. The specific length between channel of phototransistors in the light-  
 127 illuminated pixel and that of phototransistors in adjacent pixels (top, bottom:  $310 \mu\text{m}$ ,  
 128 right, left:  $300 \mu\text{m}$ , and diagonal:  $430 \mu\text{m}$ , respectively). **c**, Photocurrent mapping of  
 129 the light-illuminated pixel and adjacent pixels under red light ( $\lambda_{\text{ex}} = 638 \text{ nm}$ ) with  $P_{\text{inc}}$   
 130 of  $3.2 \text{ mW cm}^{-2}$  at  $V_{\text{gs}} = -35 \text{ V}$  and  $V_{\text{ds}} = 1 \text{ V}$ .

131

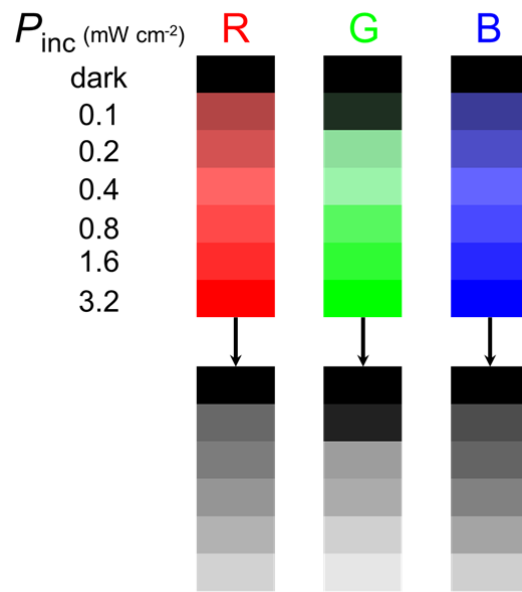

132

133 **Supplementary Figure 12 I** Grayscale image of a phototransistor in the image  
 134 sensor array under various incident power density. The RGB color scale split by  
 135 various incident power density and their grayscale equivalences, respectively.

136

137 **Supplementary Table 1** | Comparison of the performance of the proposed  
 138 photodetector with those of previous studies

| Method                                    | Layer      | Large area | Spectrum range ( $\lambda$ )         | Photo responsivity                                                               | Configuration                                          | Active pixel array | Year | Ref.      |
|-------------------------------------------|------------|------------|--------------------------------------|----------------------------------------------------------------------------------|--------------------------------------------------------|--------------------|------|-----------|
| CVD                                       | 1L         | ×          | 532 nm                               | 780 A W <sup>-1</sup> in ambient air                                             | Phototransistor SiO <sub>2</sub> - Si                  | ×                  | 2013 | S1        |
| Two-step (thermolysis process)            | 3L         | ○          | 532 nm                               | 0.57 A W <sup>-1</sup>                                                           | MSM                                                    | ×                  | 2013 | S2        |
| CVD                                       | 1L         | ×          | 488 nm<br>514.5 nm                   | 1.1 mA W <sup>-1</sup>                                                           | MSM                                                    | ×                  | 2014 | S3        |
| CVD                                       | 1L         | ○          | 650 nm                               | 10 <sup>7</sup> A W <sup>-1</sup>                                                | Phototransistor SiO <sub>2</sub> - Si                  | ×                  | 2014 | S4        |
| CVD                                       | 1L         | ×          | 475 nm<br>535 nm<br>575 nm<br>630 nm | 7.7 mA W <sup>-1</sup>                                                           | MSM                                                    | ×                  | 2015 | S5        |
| CVD                                       | 2L         | ○          | 650 nm                               | 32 mA W <sup>-1</sup>                                                            | Phototransistor SiO <sub>2</sub> - Si                  | ×                  | 2016 | S6        |
| CVD                                       | 6L         | ○          | 515 nm                               | 4–5 A W <sup>-1</sup>                                                            | Phototransistor Al <sub>2</sub> O <sub>3</sub> - Ti/Au | ×                  | 2017 | S7        |
| CVD                                       | Multilayer | ○          | 405 nm<br>532 nm                     | 12.1 mA W <sup>-1</sup>                                                          | MSM                                                    | ×                  | 2017 | S8        |
| CVD                                       | 1L         | ×          | 575 nm                               | 308 mA W <sup>-1</sup>                                                           | Homojunction photodiode                                | ×                  | 2017 | S9        |
| CVD                                       | 1L         | ○          | 405 nm<br>520 nm<br>658 nm<br>780 nm | 20 mA W <sup>-1</sup>                                                            | Phototransistor PVP - PEDOT:PSS                        | ×                  | 2017 | S10       |
| CVD                                       | 1L         | ×          | 632 nm                               | 15.6 A W <sup>-1</sup>                                                           | Phototransistor SiO <sub>2</sub> - Si                  | ×                  | 2017 | S11       |
| E-gun evaporator/CVD                      | 2L         | ○          | 408 nm<br>515 nm<br>640 nm           | 8.0 mA W <sup>-1</sup>                                                           | MSM                                                    | ×                  | 2019 | S12       |
| Pulsed laser deposition (PLD)             | 1–5L       | ○          | 300 nm<br>~<br>800 nm                | 1.96 A W <sup>-1</sup>                                                           | MSM                                                    | ×                  | 2019 | S13       |
| Sputtering/<br>e-beam irradiation/<br>CVD | Multilayer | ○          | 405 nm                               | 3.7 A W <sup>-1</sup>                                                            | Phototransistor SiO <sub>2</sub> - Si                  | ×                  | 2020 | S14       |
| MOCVD                                     | 1L         | ○          | 532 nm                               | 150 A W <sup>-1</sup>                                                            | Phototransistor SiO <sub>2</sub> - Si                  | ○                  | 2020 | S15       |
| Two-step (sputtering/CVD)                 | 2L         | ○          | 405 nm<br>532 nm<br>638 nm           | 119.16 A W <sup>-1</sup><br>116.70 A W <sup>-1</sup><br>109.00 A W <sup>-1</sup> | Phototransistor Al <sub>2</sub> O <sub>3</sub> - IZO   | ○                  | 2021 | This work |

139

140

141

142 **Supplementary Table 2 I** Comparison with the response time of the phototransistor  
143 in image sensor array without and with gate pulse.  
144

|                                             | $\tau_r$  | $\tau_f$ | Gate pulse (V, ms) |
|---------------------------------------------|-----------|----------|--------------------|
| Bilayer MoS <sub>2</sub><br>phototransistor | 169.19 ms | 104.8 ms | NA                 |
|                                             | 111.11 ms | 22.99 ms | 20, 40             |

145

146

147 **Supplementary Note 1 | Simulations**

148 The 2-D numerical simulations under illumination and in the dark are performed with a  
 149 commercial software<sup>S16</sup>. Carrier transport was treated with the drift-diffusion formalism (see  
 150 Supplementary Table 3 for the equations set). With this approach Poisson equation and  
 151 continuity equations are solved self-consistently for each applied bias (in terms of gate-to-  
 152 source and drain-to-source voltage) to obtain the electrostatic potential and the carriers'  
 153 concentration. The light source is considered to be ideal, i.e., providing constant generation  
 154 rates, for simplicity.

155 **Supplementary Table 3 | Drift-Diffusion Equations used to model electrostatics and**  
 156 **carrier transport in the device simulations.**

|                           |                                                                  |
|---------------------------|------------------------------------------------------------------|
| Poisson Equation          | $\nabla \cdot (\epsilon \nabla \psi) = -q(p - n + N_D - N_A)$    |
| Continuity Equation       | $\mp \nabla J_{n,p} = q(G_{n,p} - R_{n,p})$                      |
| Drift-Diffusion Equations | $J_n = \mu_n n (-\nabla \psi) + D_n \nabla n$                    |
|                           | $J_p = \mu_p p (-\nabla \psi) - D_p \nabla p$                    |
| Recombination Equation    | $R_{n,p} = \frac{np - n_i^2}{\tau_n(p + p_1) + \tau_p(n + n_1)}$ |

157  
 158 The device structure implemented in the simulator is schematically represented in Fig. 1, with  
 159 indication of device dimensions. The geometrical parameters adopted in the simulations are  
 160 collected in Supplementary Table 4.

161



162 **Supplementary Table 4 |** Geometrical dimensions adopted in the device simulations.

| Symbol            | Description                        | Parameter value   |
|-------------------|------------------------------------|-------------------|
| $L_G$             | Gate Length                        | 15 $\mu\text{m}$  |
| $W_G$             | Gate Width                         | 250 $\mu\text{m}$ |
| $t_{\text{ox}}$   | Gate Oxide Thickness               | 80 nm             |
| $t_{\text{chan}}$ | MoS <sub>2</sub> Channel Thickness | 2 nm              |
| $t_{\text{box}}$  | Buried Oxide Thickness             | 300 nm            |

163

164 Supplementary Table 5 collects the MoS<sub>2</sub> material parameters used in the simulations.

165 Supplementary Table 6 includes additional device parameters used in the simulations.

166 Schottky barriers are considered at the boundaries of the MoS<sub>2</sub> layer with the source and  
167 drain contacts. SHR and Radiative recombination in the semiconductor layer are also taken  
168 into account. The Al<sub>2</sub>O<sub>3</sub> is the gate oxide material ( $\epsilon_r \sim 7$ ).

169 Simulation results with no traps included are shown in Supplementary Figure 13a. No  
170 appreciable negative  $V_{\text{th}}$  shift can be observed in this case in contrast with the case with traps  
171 included, see Supplementary Figure 13b. This confirms the hypothesis concerning PG as the  
172 dominant effect determining photoresponsivity. Simulated band diagrams at different  $V_{\text{gs}}$  are  
173 shown in Supplementary Figure 14 under light illumination (i.e.,  $P_{\text{inc}} \approx 10^{-1} \text{ mW cm}^{-2}$ ) with  
174 (Supplementary Figures 14a-e) and without traps (Supplementary Figures 14f-j) included in  
175 the simulations. When light generates electron-hole pairs the excess holes get trapped into the  
176 trap level at 0.2 eV above  $E_V$  causing  $V_{\text{th}}$  to shift. This is illustrated by Supplementary Figure  
177 15, that shows the trapped charge density ( $N_T^+$ ) at different  $V_{\text{gs}}$  in the dark and with light  
178 illumination, clearly indicating that more charge gets trapped in the latter case than in the  
179 former.

180 **Supplementary Table 5** | MoS<sub>2</sub> material parameters<sup>S17</sup>.

| Symbol       | Description                                        | Parameter value                                |
|--------------|----------------------------------------------------|------------------------------------------------|
| $E_G$        | Band Gap                                           | 1.4 eV                                         |
| $\chi$       | Electron Affinity                                  | 4.4 eV                                         |
| $\epsilon_r$ | MoS <sub>2</sub> Relative Dielectric Constant      | 5                                              |
| $N_C$        | Effective Density of States in the Conduction Band | $1.12 \times 10^{19} \text{ cm}^{-3}$          |
| $N_V$        | Effective Density of States in the Valence Band    | $2.54 \times 10^{19} \text{ cm}^{-3}$          |
| $n_i$        | Intrinsic Carrier Concentration                    | $2.93 \times 10^7 \text{ cm}^{-3}$             |
| $N_A$        | Doping Concentration (p-type)                      | $5.0 \times 10^{19} \text{ cm}^{-3}$           |
| $\mu_{n,p}$  | Carriers' Mobility                                 | $5 \text{ cm}^2 \text{ V}^{-1} \text{ s}^{-1}$ |
| $\tau_{n,p}$ | Carriers' Lifetime                                 | 1 $\mu\text{s}$                                |

181

182 **Supplementary Table 6** | Additional device parameters used in the simulations.

| Symbol            | Description                                                    | Parameter value |
|-------------------|----------------------------------------------------------------|-----------------|
| $\epsilon_{r,ox}$ | Relative Dielectric Constant (Al <sub>2</sub> O <sub>3</sub> ) | 7               |
| $\Phi_G$          | Gate Contact Work-Function                                     | 5 eV (IZO)      |
| $\Phi_{S,D}$      | Source, Drain Contacts Work-Function                           | 5 eV (Gold)     |

183

184

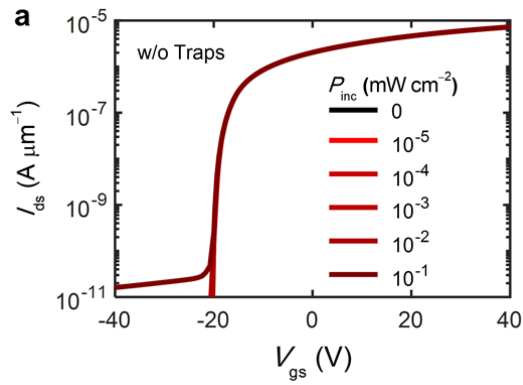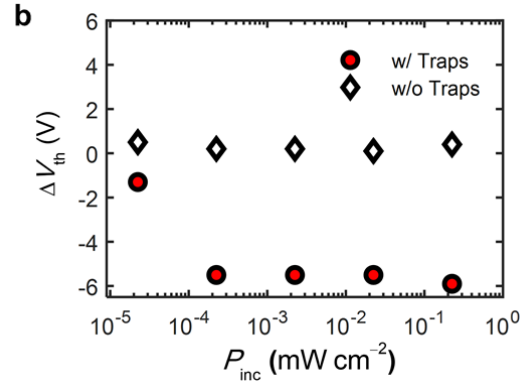

185

186 **Supplementary Figure 13 | Additional simulation results. a**, Simulated  $I_{ds}$ - $V_{gs}$  with  
 187 no traps included under light illumination, for different incident power densities ( $P_{inc}$ ).  
 188 **b**, Comparison of the Threshold Voltage Shift ( $\Delta V_{th}$ ) vs  $P_{inc}$  extracted from the  $I_{ds}$ - $V_{gs}$   
 189 simulation with and without traps included.

190

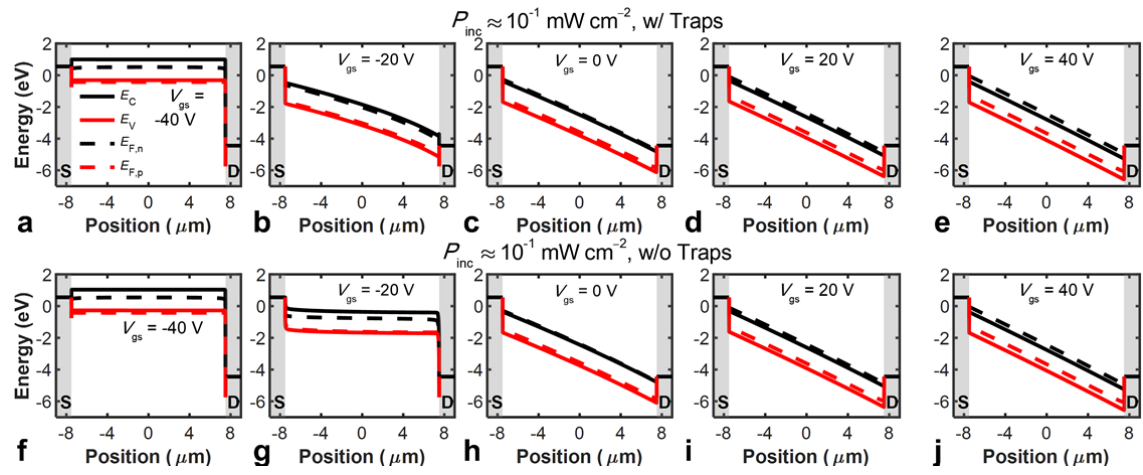

191

192 **Supplementary Figure 14 I** Simulated energy band diagrams for different  $V_{gs} = (-40,$   
 193  $-20, 0, 20, 40)$  V under light illumination ( $P_{inc} \approx 10^{-1} \text{ mW cm}^{-2}$ ) with (a-e) and without  
 194 traps (f-j).

195

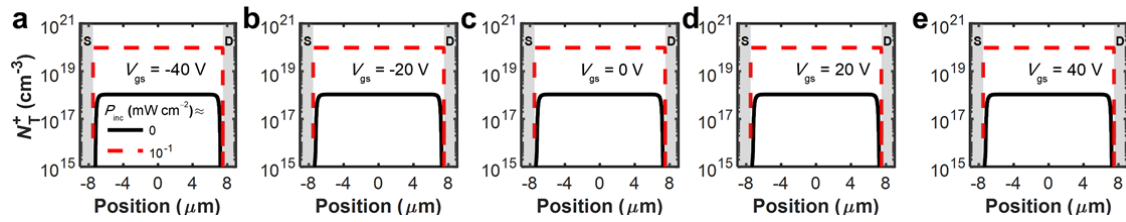

196

197 **Supplementary Figure 15 I Trapped charge density.** **a-e**, Trapped charge density  
 198 ( $N_T^+$ ) for different  $V_{gs} = (-40, -20, 0, 20, 40)$  V in the dark ( $P_{inc} = 0$  mW cm<sup>-2</sup>, black  
 199 lines). and under light illumination ( $P_{inc} \approx 10^{-1}$  mW cm<sup>-2</sup>, red-dashed lines).

200

201 **Supplementary References**

- 202 S1. Zhang, W. et al. High-gain phototransistors based on a CVD MoS<sub>2</sub> monolayer. *Adv.*  
203 *Mater.* **25**, 3456-3461 (2013).
- 204 S2. Tsai, D.-S. et al. Few-layer MoS<sub>2</sub> with high broadband photogain and fast optical  
205 switching for use in harsh environments. *ACS Nano* **7**, 3905-3911 (2013).
- 206 S3. Perea-López, N. et al. CVD-grown monolayered MoS<sub>2</sub> as an effective photosensor  
207 operating at low-voltage. *2D Mater.* **1**, 011004 (2014).
- 208 S4. Zhang, W. et al. Ultrahigh-gain photodetectors based on atomically thin graphene-  
209 MoS<sub>2</sub> heterostructures. *Sci. Rep.* **4**, 1-8 (2014).
- 210 S5. Le, C. T. et al. Photosensitivity Study of Metal-Semiconductor-Metal Photodetector  
211 Based on Chemical Vapor Deposited Monolayer MoS<sub>2</sub>. *J. Nanosci. Nanotechnol.* **15**,  
212 8133-8138 (2015).
- 213 S6. Chen, C. et al. Large-scale synthesis of a uniform film of bilayer MoS<sub>2</sub> on graphene  
214 for 2D heterostructure phototransistors. *ACS Appl. Mater. Interfaces* **8**, 19004-19011  
215 (2016).
- 216 S7. Choi, C. et al. Human eye-inspired soft optoelectronic device using high-density  
217 MoS<sub>2</sub>-graphene curved image sensor array. *Nat. Commun.* **8**, 1-11 (2017).
- 218 S8. Lee, S. H. et al. Large-area growth of multi-layered MoS<sub>2</sub> for violet (~405 nm)  
219 photodetector applications. *Phys. Status Solidi A* **214**, 1700221 (2017).
- 220 S9. Zhang, X. et al. Poly(4-styrenesulfonate)-induced sulfur vacancy self-healing strategy  
221 for monolayer MoS<sub>2</sub> homojunction photodiode. *Nat. Commun.* **8**, 1-8 (2017).
- 222 S10. Kim, T.-Y. et al. Transparent large-area MoS<sub>2</sub> Phototransistors with inkjet-printed  
223 components on flexible platforms. *ACS Nano* **11**, 10273-10280 (2017).
- 224 S11. Nie, C. et al. Ultrafast growth of large-area monolayer MoS<sub>2</sub> film via gold foil  
225 assistant CVD for a highly sensitive photodetector. *Nanotechnology* **28**, 275203  
226 (2017).
- 227 S12. Chen, S.-W. H. et al. Enhanced wavelength-selective photoresponsivity with a MoS<sub>2</sub>  
228 bilayer grown conformally on a patterned sapphire substrate. *J. Mater. Chem. C* **7**,  
229 1622-1629 (2019).
- 230 S13. Jiao, L. et al. Layer-dependent photoresponse of 2D MoS<sub>2</sub> films prepared by pulsed  
231 laser deposition. *J. Mater. Chem. C* **7**, 2522-2529 (2019).
- 232 S14. Park, H. et al. Exceptionally Uniform and Scalable Multilayer MoS<sub>2</sub> Phototransistor  
233 Array Based on Large-Scale MoS<sub>2</sub> Grown by RF Sputtering, Electron Beam  
234 Irradiation, and Sulfurization. *ACS Appl. Mater. Interfaces* **12**, 20645-20652 (2020).
- 235 S15. Jang, H. et al. An atomically thin optoelectronic machine vision processor. *Adv. Mater.*  
236 **32**, 2002431 (2020).
- 237 S16. Synopsys Sentaurus SDevice Manual (O-2018.06) (2018).
- 238 S17. K.-C. Wang et al. Control of interlayer physics in 2H transition metal dichalcogenides.  
239 *J. Appl. Phys.* **122**, 224302 (2017).
